# Supplementary material
Source: MDPI journal article supplement (https://www.mdpi.com/2071-1050/12/3/820)
Supplement: s1 [file s1]

Supplementary Information

“The alerting effect from rising public awareness of air quality on the outdoor activities of megacity residents” by Lee et al.

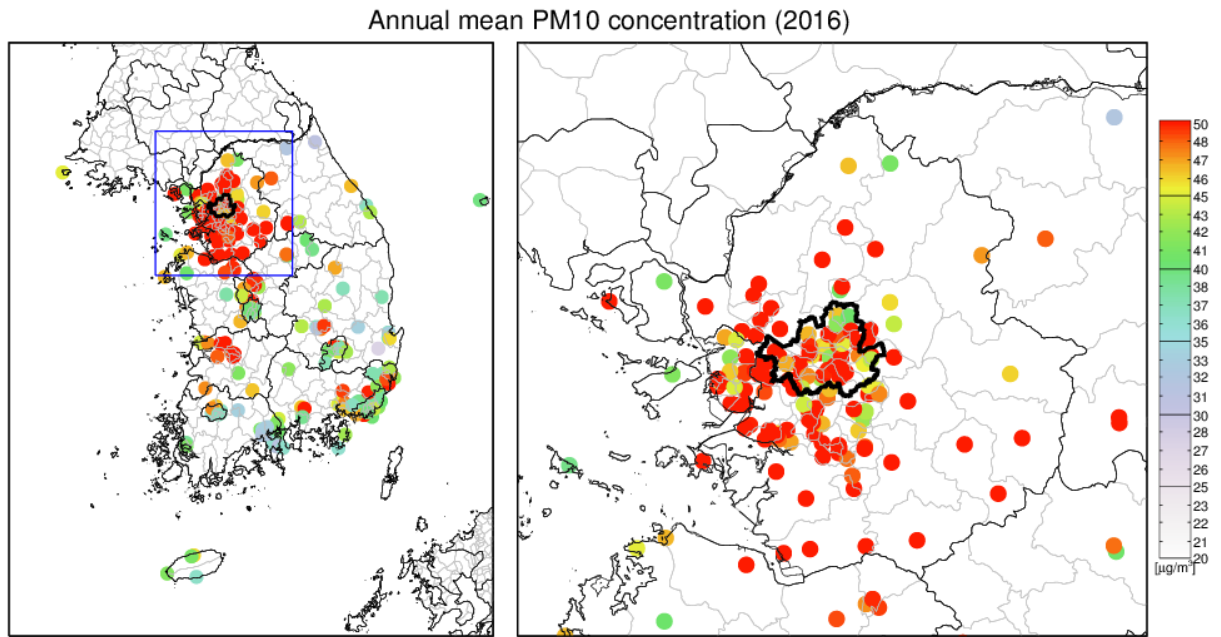

Figure S1 Spatial distribution of annual mean surface PM10 concentration over South Korea (left) and Seoul Metropolitan Area. Thick black line indicates the administrative boundary of Seoul.

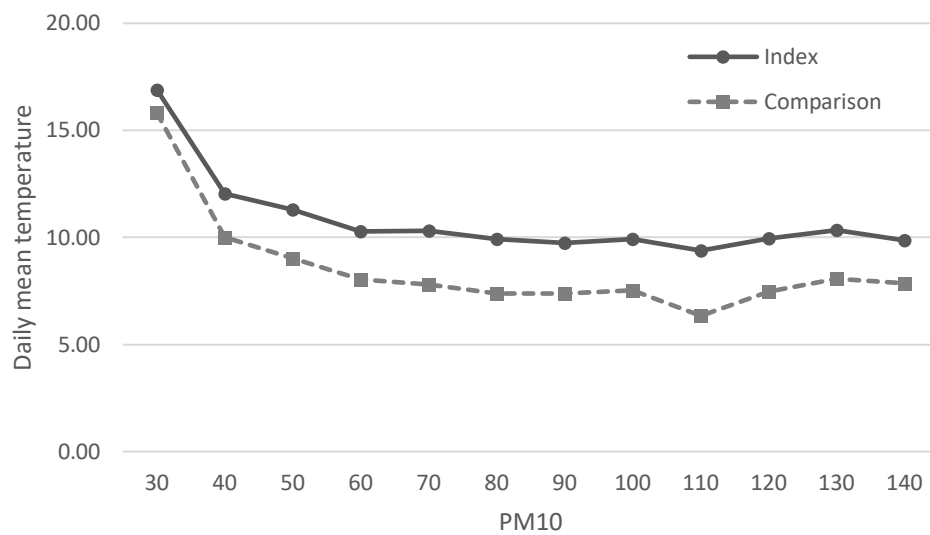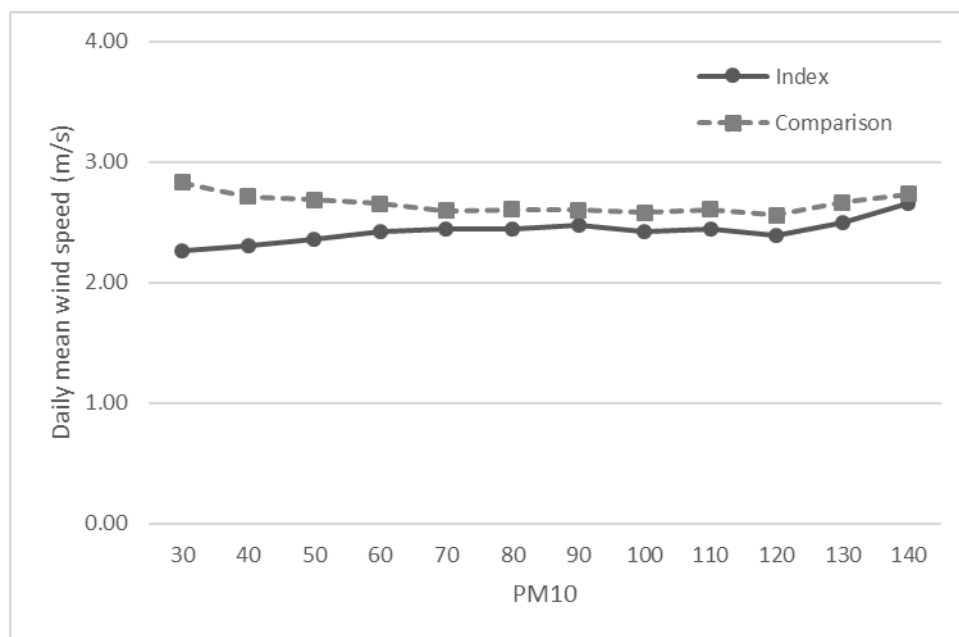

Figure S2 Daily mean temperatures (upper) and daily mean wind speed (lower) on index and comparison days during 2008-2016.
